# Supplementary material
Source: PubMed Central journal article supplement (PMC7964836)
Supplement: 3569_figures.pdf [file 3569_figures.pdf]

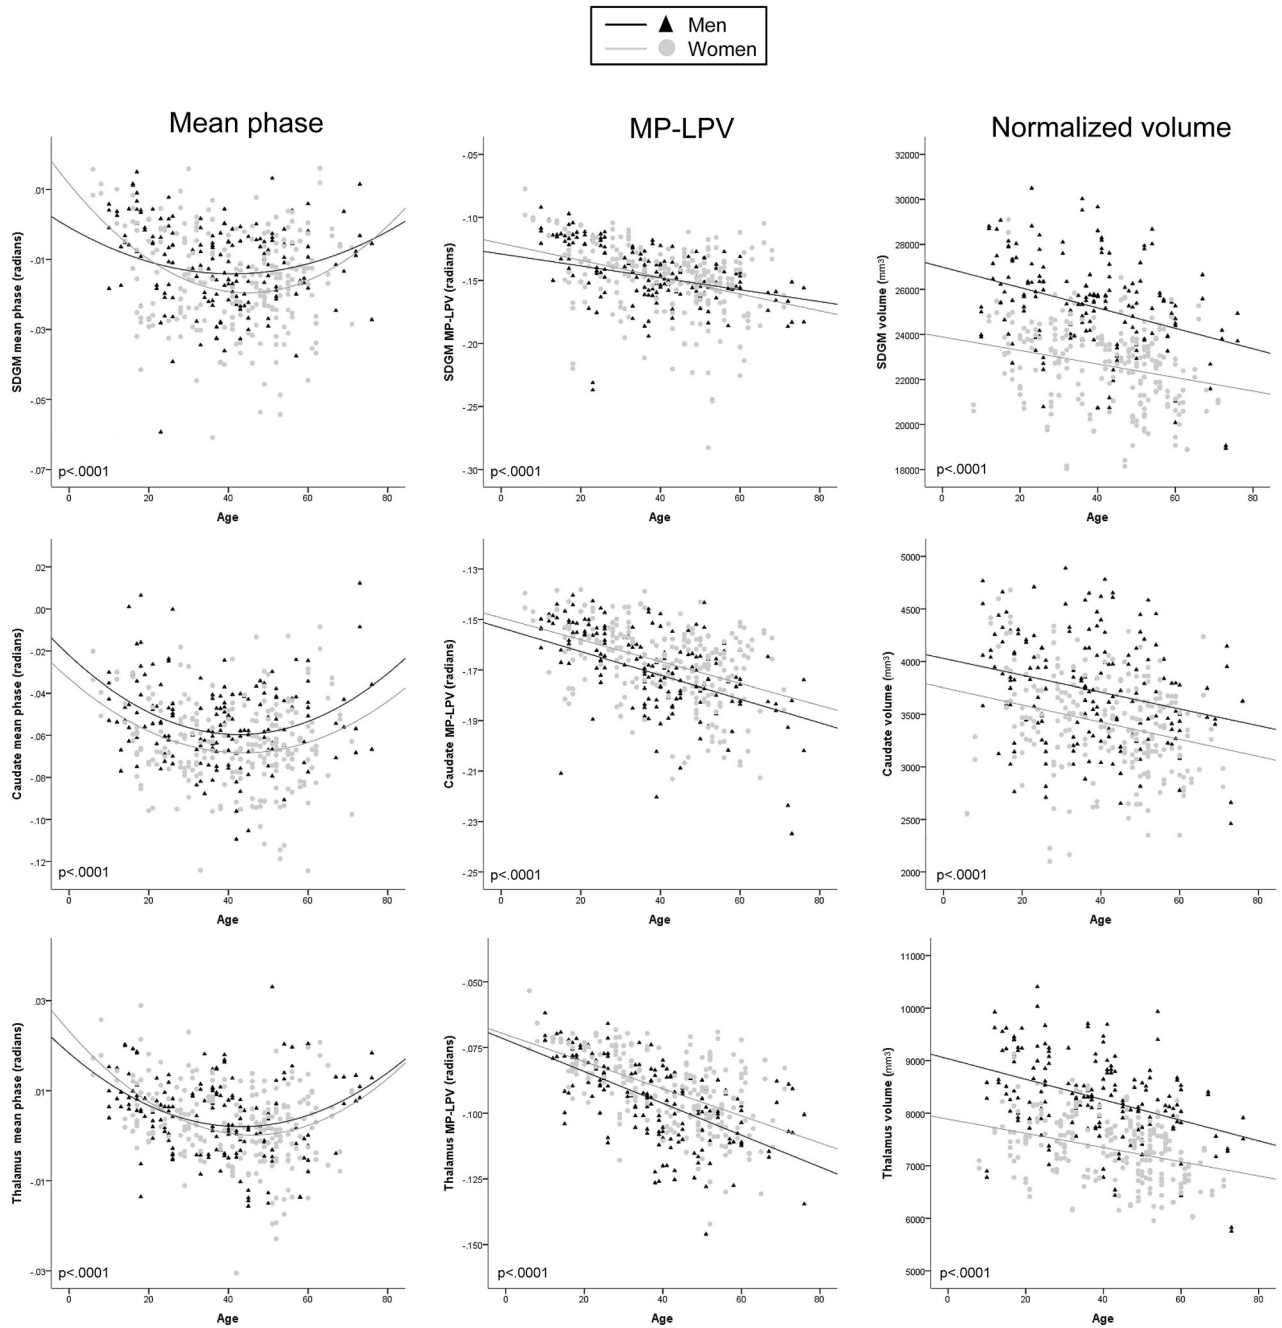

**ON-LINE FIG1.** Scatterplots showing the relationship between age and mean phase, mean phase of low-phase voxels (MP-LPV), and normalized volumes of the total SDGM, caudate, putamen, globus pallidus, thalamus, and pulvinar nucleus. Regression lines shown (linear, quadratic) were plotted by determining the best fit by use of  $R^2$ .

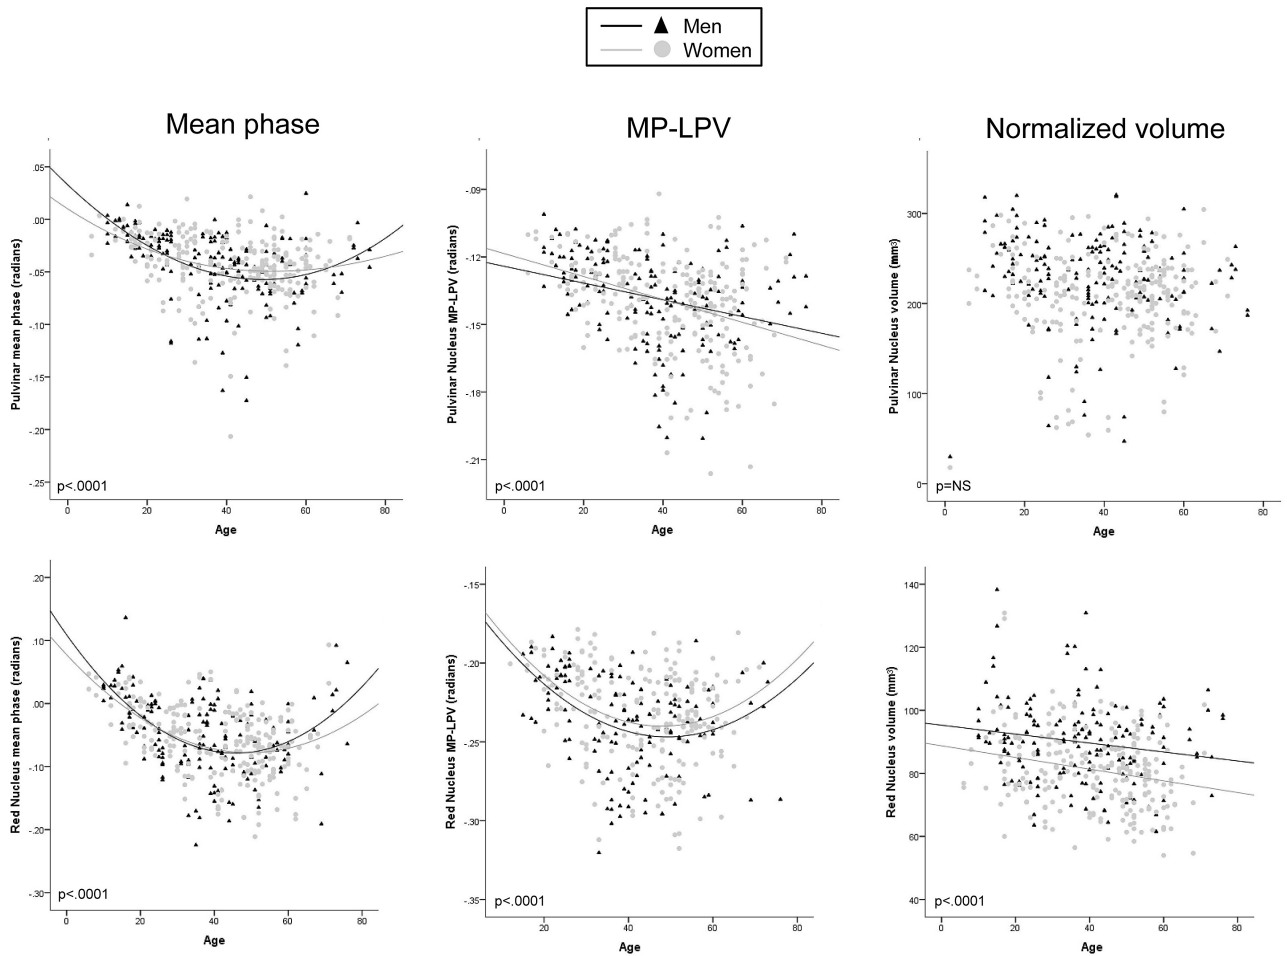

**ON-LINE FIG 2.** Scatterplots showing the relationship between age and mean phase, mean phase of low-phase voxels (MP-LPV), and normalized volumes of the hippocampus, amygdala, nucleus accumbens, red nucleus, and substantia nigra. Regression lines shown (linear, quadratic) were plotted by determining the best fit by use of  $R^2$ . Nonsignificant regression lines were omitted.
